# Supplementary material for: Methods of Inactivation of Highly Pathogenic Viruses for Molecular, Serology or Vaccine Development Purposes
Source: MDPI journal article supplement (doi:10.3390/pathogens11020271), 2022-02-19
Supplement: s1 [file s1]

**Table S1:** Inactivating protocols with correlation to virus family.

|                                                           | <i>Togaviridae</i>                                                                                       | <i>Flaviviridae</i>                                                                                    | <i>Filoviridae</i>                                                                                                                | <i>Arenaviridae</i>                                                           | <i>Hantaviridae/<br/>Phenuiviridae/<br/>Nairoviridae/<br/>Peribunyaviridae</i>             | <i>Orthomyxoviridae</i>                                                                                                                                            |
|-----------------------------------------------------------|----------------------------------------------------------------------------------------------------------|--------------------------------------------------------------------------------------------------------|-----------------------------------------------------------------------------------------------------------------------------------|-------------------------------------------------------------------------------|--------------------------------------------------------------------------------------------|--------------------------------------------------------------------------------------------------------------------------------------------------------------------|
| HEAT                                                      | Highly variable:<br>CHIKV 56 °C 120 min; RRV 56 °C 120 min; ONNV 56 °C 40 min; BFV 56 °C 30 min, [14,39] | 56 °C, 30 min or 60 °C 3 min (Alkhurma); 56 °C, 30 min (YFHV) [15,37]                                  | 60 °C, 60 min + denaturing solution, (BSL-4 pathogen) [11] 0.1% SDS + 0.1% Tween-20 + 60 °C, 15 min (BSL-4 pathogen) [6,11,13,17] | 60 °C, 60 min (LASV) [13] or in combination with a denaturizing solution [11] |                                                                                            | 55.6 °C, 30 min (H3N2,H7N3,H1N1p) [49].                                                                                                                            |
| SOLVENTS<br>Alcohol/ acetone                              |                                                                                                          |                                                                                                        |                                                                                                                                   |                                                                               | Methanol (absolute), 8 min; acetone/methanol (1:1) 10 min. (HTNV) <i>Hantaviridae</i> [29] |                                                                                                                                                                    |
| IONIC DETERGENTS                                          |                                                                                                          |                                                                                                        |                                                                                                                                   |                                                                               |                                                                                            |                                                                                                                                                                    |
| Sodium dodecyl sulfacte (SDS)                             |                                                                                                          |                                                                                                        | 0.1% SDS + 0.1% Tween-20 + 60 °C, 15 min (BSL-4 pathogen) [6,11,13,17]                                                            |                                                                               |                                                                                            |                                                                                                                                                                    |
| NON-IONIC DETERGENTS                                      |                                                                                                          |                                                                                                        |                                                                                                                                   |                                                                               |                                                                                            |                                                                                                                                                                    |
| Triton X-100                                              |                                                                                                          |                                                                                                        | AVL + 0.1% Triton X-100, 20 min. [7]                                                                                              |                                                                               |                                                                                            | 1% Triton X-100, 1 h, room temp (H3N2,H7N3,H1N1p) [49].                                                                                                            |
| Tween-20 / Tween-80                                       |                                                                                                          |                                                                                                        | 0.1% SDS + 0.1% Tween-20 + 60 °C, 15 min (BSL-4 pathogen) [6,11,13,17]                                                            |                                                                               |                                                                                            |                                                                                                                                                                    |
| ALDEHYDES                                                 |                                                                                                          |                                                                                                        |                                                                                                                                   |                                                                               |                                                                                            |                                                                                                                                                                    |
| Formaldehyde (CH <sub>2</sub> O)                          |                                                                                                          | Formalin 0.2%, 120 h, 32 °C (WNV) [89]<br><br>0.02% formaldehyde, pH 7.4, 22 °C, 120 min (DENV 2) [18] |                                                                                                                                   |                                                                               |                                                                                            | 0.04% formalin, 16 h, 37 °C; 0.02% formalin, 48 h 37 °C. (HPAI: H5N1; LPAI: H9N2, H4N6, H11N1) [78]<br><br>0.02% formalin, 18 h, room temp (H3N2,H7N3,H1N1p) [49]. |
| Glutaraldehyde (HCO-(CH <sub>2</sub> ) <sub>3</sub> -CHO) | 0.1%, 24 h, 4 °C. (Sindbis v.) [82]                                                                      |                                                                                                        |                                                                                                                                   |                                                                               |                                                                                            |                                                                                                                                                                    |
| Paraformaldehyde (OH(CH <sub>2</sub> O) <sub>n</sub> H)   |                                                                                                          |                                                                                                        |                                                                                                                                   |                                                                               | 1% paraformaldehyde, 20 min. (HTNV) <i>Hantaviridae</i> [29]                               |                                                                                                                                                                    |

|                                                                                                                                                                        |                                                                                                  |                                                                                                      |                                                                                                                                             |                                                                                                        |                                                                                                                                      |                                                                                                                                                                                                  |
|------------------------------------------------------------------------------------------------------------------------------------------------------------------------|--------------------------------------------------------------------------------------------------|------------------------------------------------------------------------------------------------------|---------------------------------------------------------------------------------------------------------------------------------------------|--------------------------------------------------------------------------------------------------------|--------------------------------------------------------------------------------------------------------------------------------------|--------------------------------------------------------------------------------------------------------------------------------------------------------------------------------------------------|
| GUANIDINE<br>BASED CHA-<br>OTROPIC SALTS<br>(nucleic acid ex-<br>traction kits), e.g.,<br>Trizol LS, AVL<br>buffer, Magna<br>pure lysis/bind-<br>ing buffer<br>(MPLB). | 560 µL Trizol LS<br>reagent, 10 min<br>incubation, room<br>temp.<br>(WEEV, EEEV<br>and VEEV) [2] | 560 µL Trizol LS<br>reagent, 10 min<br>incubation, room<br>temp.<br>(DENV, WNV) [2]                  | 560 µL Trizol LS<br>reagent, 10 min<br>incubation, room<br>temp.<br>(EBOV, MARV)<br>[2,11]<br><br>AVL + 0.1%<br>Triton X-100, 20<br>min [7] | 560 µL Trizol LS re-<br>agent, 10 min incu-<br>bation, room temp.<br>(RVF) <i>Phenuiviridae</i><br>[2] |                                                                                                                                      |                                                                                                                                                                                                  |
|                                                                                                                                                                        | MPLB directly in<br>EDTA tube<br>(EBOV) [5]                                                      |                                                                                                      |                                                                                                                                             |                                                                                                        |                                                                                                                                      |                                                                                                                                                                                                  |
| PHOTOACTIVE COMPOUNDS                                                                                                                                                  |                                                                                                  |                                                                                                      |                                                                                                                                             |                                                                                                        |                                                                                                                                      |                                                                                                                                                                                                  |
| 1.5-iodonaphtyl<br>azide (INA)                                                                                                                                         | 50 µM INA, UV-<br>A 5 min. (CHIKV)<br>[82]                                                       | 50 µM INA, UV-<br>A 5 min (DENV<br>2) [18]                                                           | 100 µM, 30 min,<br>room temp + UV-<br>A, 10 min (EBOV)<br>[80]                                                                              |                                                                                                        |                                                                                                                                      |                                                                                                                                                                                                  |
| Psoralen                                                                                                                                                               | AMT and UV-A<br>light exposure<br>(see figure 1 for<br>dose)<br>(VEEV) [1]                       | AMT and UV-A<br>light exposure<br>(see Table 1 for<br>dose)<br>(DENV, WNV,<br>SLEV, YFHV) [1]        | AMT and UV-A<br>light exposure<br>(see Table 1 for<br>dose)<br>(EBOV, MARV)<br>[1]                                                          | AMT and UV-A<br>light exposure<br>(see Table 1 for<br>dose)<br>(LASV, JUNV) [1]                        | AMT and UV-A<br>light exposure (see<br>Table 1 for dose)<br>(CCHFV) <i>Nairoviri-<br/>dae</i> , (RVF) <i>Phenui-<br/>viridae</i> [1] | AMT and UV-A<br>light exposure (see<br>Table 1 for dose)<br>(H1N1p, H1N1,<br>H3N2) [1]                                                                                                           |
|                                                                                                                                                                        |                                                                                                  | AMT 35 µM, UV-<br>A 2 min [18]                                                                       |                                                                                                                                             |                                                                                                        |                                                                                                                                      |                                                                                                                                                                                                  |
| Methylene blue<br>(MB)                                                                                                                                                 |                                                                                                  | 20 µM MB 20 min<br>(in dark), 40 W<br>fluorescent bulb,<br>10 min, 3log re-<br>duction (WNV)<br>[86] |                                                                                                                                             |                                                                                                        |                                                                                                                                      |                                                                                                                                                                                                  |
| Riboflavin (vita-<br>min B2)                                                                                                                                           |                                                                                                  |                                                                                                      |                                                                                                                                             |                                                                                                        |                                                                                                                                      |                                                                                                                                                                                                  |
| OXIDIZING<br>AGENTS:                                                                                                                                                   |                                                                                                  |                                                                                                      |                                                                                                                                             |                                                                                                        |                                                                                                                                      |                                                                                                                                                                                                  |
| Hydrogen perox-<br>ide (H <sub>2</sub> O <sub>2</sub> )                                                                                                                |                                                                                                  | 3% H <sub>2</sub> O <sub>2</sub> , 2 h, pH<br>7.4, 20–24 °C<br>(WNV, YFHV)<br>[58]                   | 3% H <sub>2</sub> O <sub>2</sub> , 2 h, pH<br>7.4, 20–24 °C<br>(LCMV) [58]                                                                  |                                                                                                        |                                                                                                                                      | 1% H <sub>2</sub> O <sub>2</sub> , 2 h, room<br>temp (H1N1,<br>H1N1 <sub>pdm09</sub> , H3N2)<br>[59]                                                                                             |
| ALKYLATING AGENTS                                                                                                                                                      |                                                                                                  |                                                                                                      |                                                                                                                                             |                                                                                                        |                                                                                                                                      |                                                                                                                                                                                                  |
| Beta-propio-<br>lactone (BPL)                                                                                                                                          |                                                                                                  | BPL 0.1%, 48 h,<br>4 °C (WNV) [89].                                                                  |                                                                                                                                             |                                                                                                        |                                                                                                                                      | 0.1% BPL, 16 h, 4<br>°C, hydrolysis 2 h,<br>37 °C (HPAI:<br>H5N1; LPAI:<br>H9N2, H4N6,<br>H11N1) [78].<br><br>0.094% BPL, 16 h, 4<br>°C, hydrolysis 2 h,<br>37 °C<br>(H3N2,H7N3,H1N1<br>p) [49]. |

|                           |                                                                                                             |                                                           |
|---------------------------|-------------------------------------------------------------------------------------------------------------|-----------------------------------------------------------|
|                           |                                                                                                             | 0.02% BPL, 24 h, 4 °C, hydrolysis 7 h, 37 °C (H3N2) [73]. |
| IRRADIATION               |                                                                                                             |                                                           |
| UV-radiation              | 6000 µJ/cm <sup>2</sup> of UVC; 40,000 µJ/cm <sup>2</sup> of UVC in microcrystalline form (Sindbis v.) [82] | UV-A (312 nm), 3 min. (HTNV) <i>Hantaviridae</i> [29]     |
| Gamma-irradiation         | 3Mrad gamma (rVSV encoding EBOV-gp) [45]                                                                    | 3Mrad gamma (LACV) <i>Peribunyaviridae</i> [45]           |
| DISULFIDE BASED COMPOUNDS | 40 µM NSC20625, 90 min, 37 °C (JUNV) [51,52].                                                               |                                                           |
